# Supplementary material
Source: MDPI journal article supplement (https://www.mdpi.com/1999-4907/11/7/779)
Supplement: s1 [file s1]

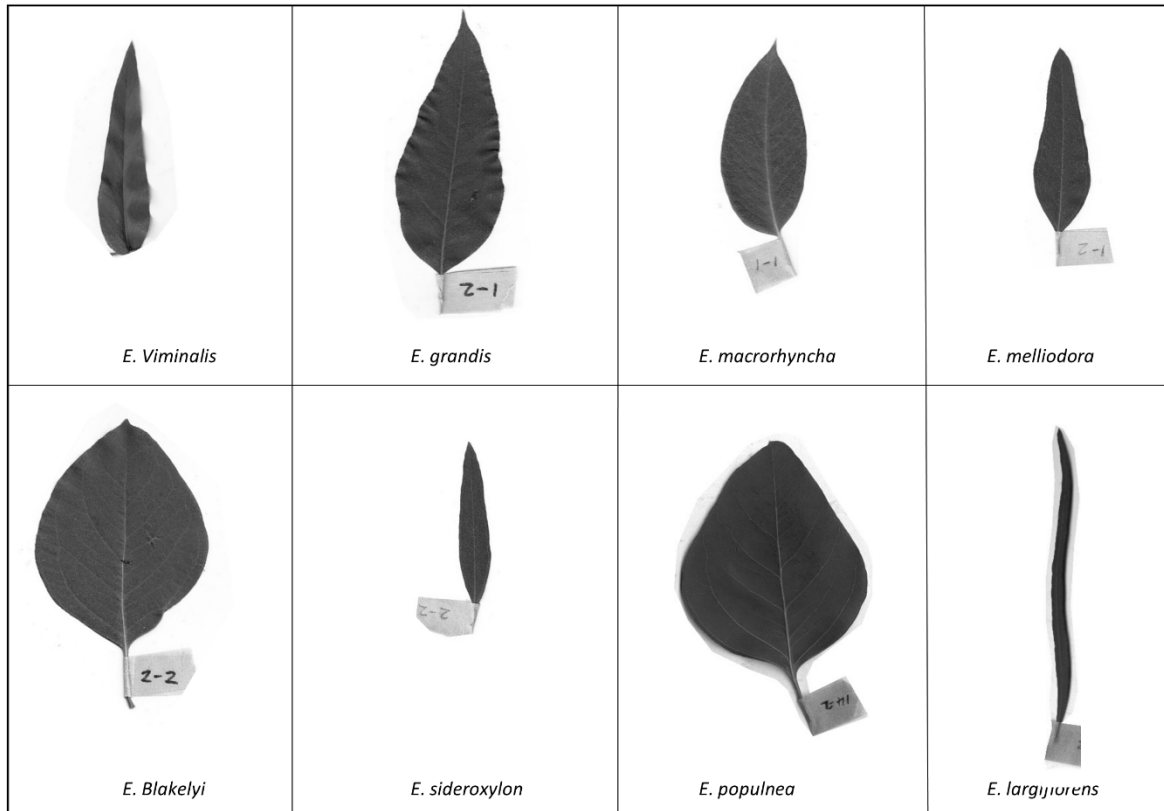

**Figure S1.** Scanned images of the leaves of each species used in the common garden study. Not to scale.

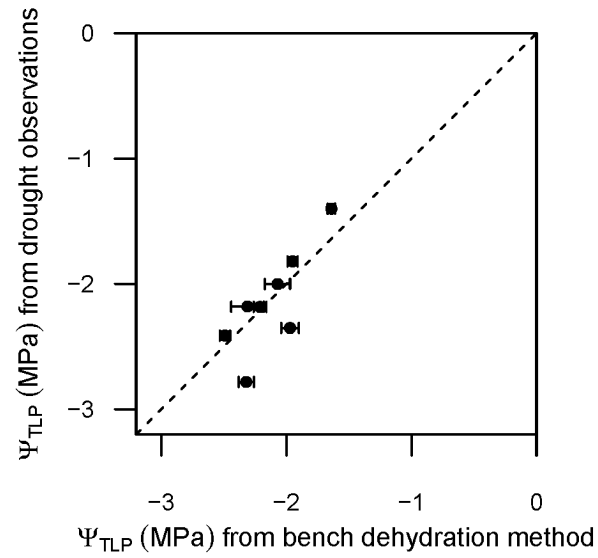

**Figure S2.** Turgor loss point ( $\Psi_{TLP} \pm 1SE$ ) of eight *Eucalyptus* species, calculated from standard pressure-volume curves (bench dehydration method) and  $\Psi_{TLP}$  calculated from progressive observations of leaf water potential ( $\Psi_{leaf}$ ) and live fuel moisture content (LFMC) of plants subject to imposed drought. Mean absolute error is 0.19 MPa.
